# Supplementary material for: Statistical hypothesis testing of factor loading in principal component analysis and its application to metabolite set enrichment analysis
Source: Springer Nature journal article supplement (doi:10.1186/1471-2105-15-51), 2014-02-21

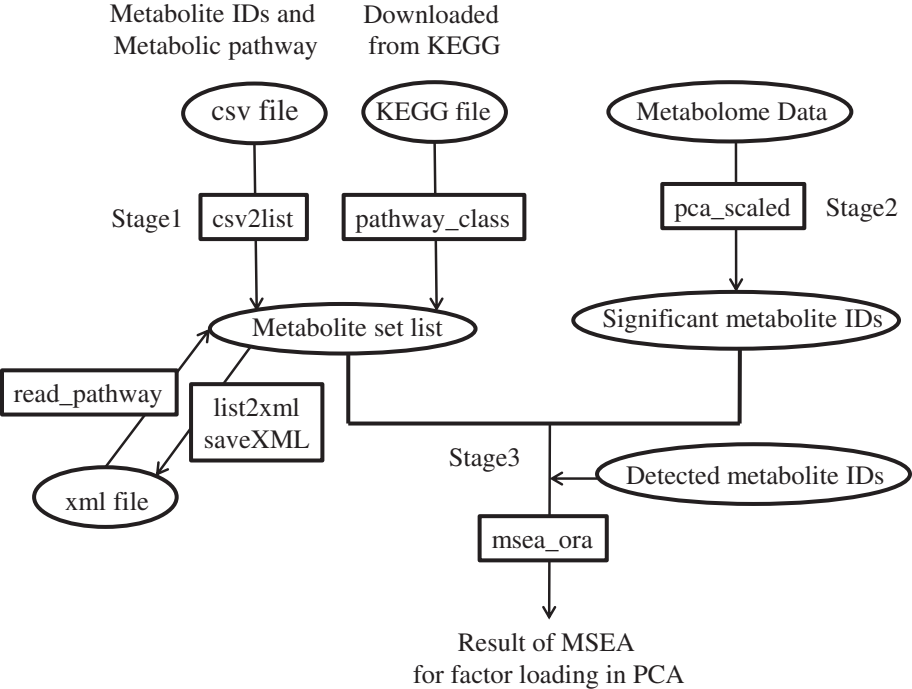

Supplement: 12859_2013_6819_MOESM2_ESM.pdf [file 12859_2013_6819_MOESM2_ESM.pdf]
